# Supplementary material
Source: PubMed Central journal article supplement (PMC2788609)
Supplement: NIHMS75784-supplement-supplementary_info.pdf [file NIHMS75784-supplement-supplementary_info.pdf]

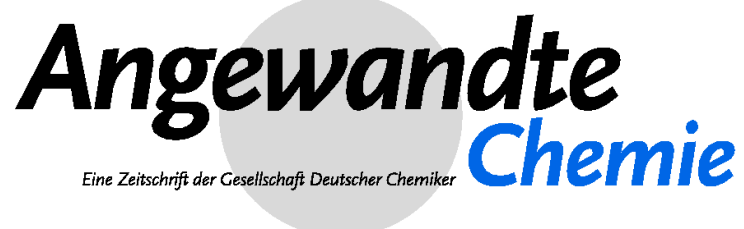

Supporting Information

© Wiley-VCH 2006

69451 Weinheim, Germany

# “Control of the yeast cell cycle with a photocleavable $\alpha$ -factor analog”

Laurie L. Parker, Josh Kurutz, Stephen B. H. Kent, Stephen J. Kron\*

## Contents

A. Peptide characterization data

B. Peptide photocleavage data

C. Halo assay

D. Conformational analysis by NMR

## A. Peptide characterization data

Supp. Fig. 1. a) crude peptide 1; b) purified peptide 1; c) crude peptide 2; d) purified diastereomer 2a; e) purified diastereomer 2b.

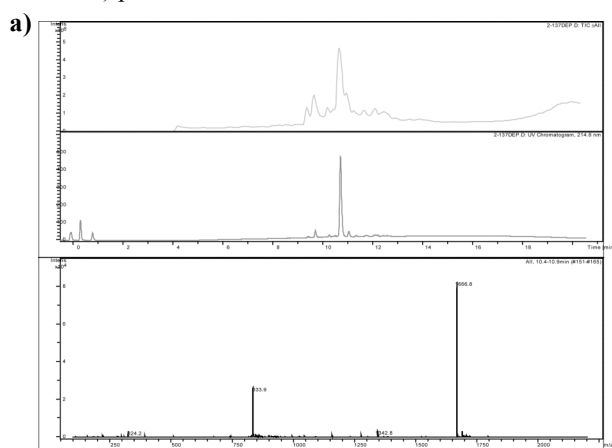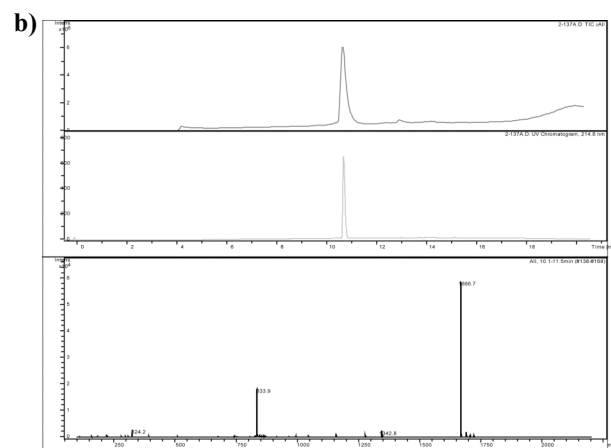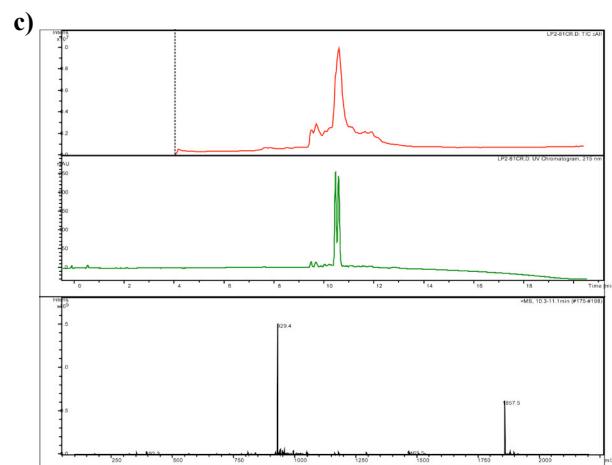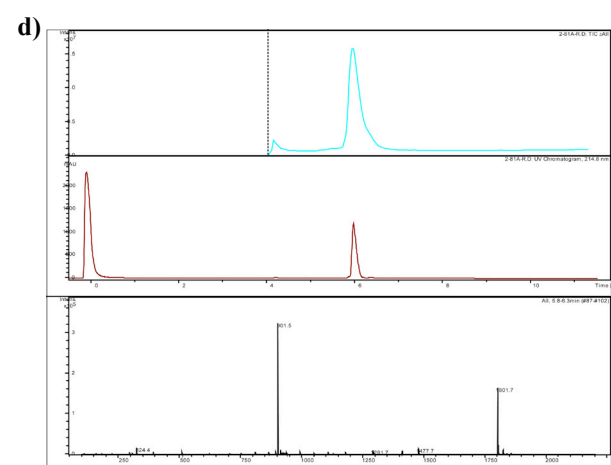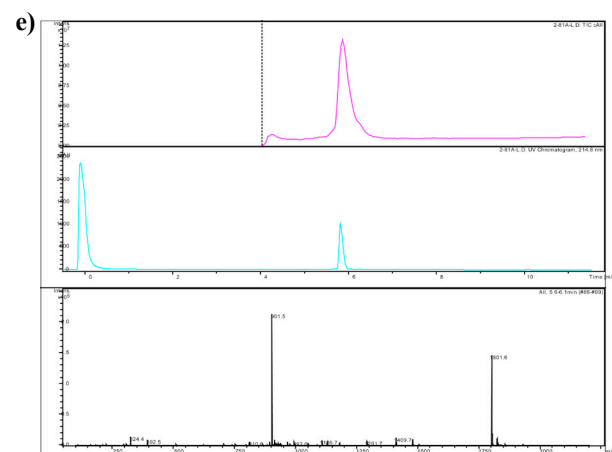

## B. Peptide photocleavage data

Supp. Fig. 2. UV-induced degradation (366 nm, 5 mW/cm<sup>2</sup>) of **2** monitored by HPLC

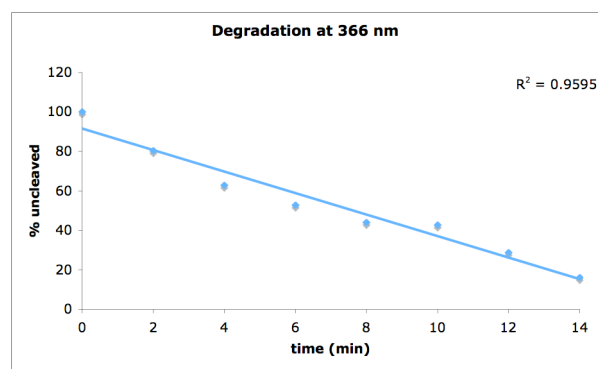

## C. Halo assay

Supp. Fig. 3. Representative plate images from disc diffusion assay to measure growth arrest halos.

a) peptide **1**; b) peptide **2a** (D); c) peptide **2** (D/L); d) peptide **2b** (L)

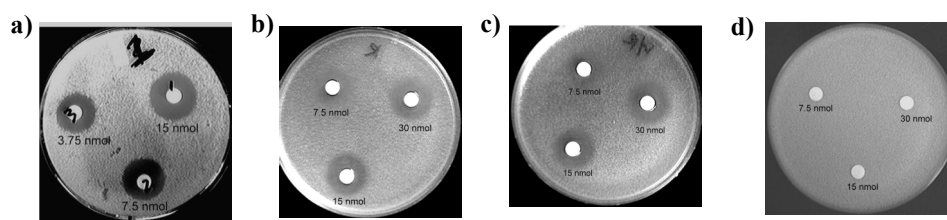

## D. Conformational analysis by NMR

The active peptide was analyzed by NOESY NMR to determine the configuration of the photocleavable residue. A portion of the NOESY spectrum and backbone assignments are given in Supp. Fig. 4. The spectrum was analyzed to identify key cross peaks that, based on molecular modeling, indicate the D-configuration at the photocleavable residue. The results of this analysis are summarized in Supp. Table 1.

Supp. Fig. 4. Sequential backbone assignments in the HN/HA region of the NOESY spectrum of the active peptide.

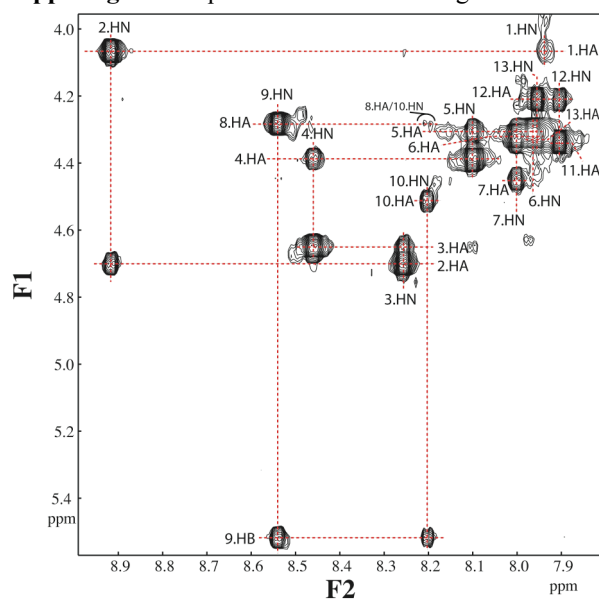

**Supp. Table 1.** Table summarizing the cross peaks identified to support the assignment of D-configuration for the photocleavable residue in the active peptide isomer.

| <sup>1</sup> H- <sup>1</sup> H pair | NOESY crosspeak volume | D model <sup>1</sup> H- <sup>1</sup> H distance (Å, average) | L model <sup>1</sup> H- <sup>1</sup> H distance (Å, average) | difference   D-L  , Å | Supports D or L                                              |
|-------------------------------------|------------------------|--------------------------------------------------------------|--------------------------------------------------------------|-----------------------|--------------------------------------------------------------|
| 9.HA – 10.HA                        | 3.67<br>(weak)         | 4.64                                                         | 5.96                                                         | 1.32                  | D: would expect no xpk from L                                |
| 9.HA – 10.HB1                       | Not observed           | 3.70                                                         | 5.81                                                         | 2.11                  | L: but absence of NOE is not a good indicator of distance    |
| 9.HD1 – 10.HA                       | Not observed           | 6.65                                                         | 3.95                                                         | 2.70                  | D: but absence of NOE is not a good indicator of distance    |
| 9.HD1 – 10.HB1                      | 4.51<br>(weak)         | 5.96                                                         | 2.77                                                         | 3.19                  | D: L would be more likely associated w/ stronger xpk         |
| 9.HD1 – 10.HN                       | 10.49<br>(weak)        | 5.06                                                         | 2.79                                                         | 2.27                  | D: L would be more likely associated w/ stronger xpk         |
| 9.HD1 – 8.HB1                       | 31.64<br>(medium)      | 3.24                                                         | 5.03                                                         | 1.79                  | D: moderately strong xpk associated w/ medium-short distance |
| 9.HD1 – 8.HB2                       | 13.02<br>(weak)        | 4.82                                                         | 6.52                                                         | 1.60                  | D: would expect no xpk from L                                |
